# Supplementary material for: Immediate change following valve deployment in left ventricular systolic and diastolic functions in transcatheter aortic valve replacement: a retrospective cohort study
Source: PubMed Central journal article supplement — J Thorac Dis. 2024 Sep 11;16(9):5643–9. doi: 10.21037/jtd-24-784 (PMC11494578; doi:10.21037/jtd-24-784), 2024-09-11
Supplement: jtd-16-09-5643-rc.pdf [file jtd-16-09-5643-rc.pdf]

## STROBE Statement—checklist of items that should be included in reports of observational studies

| Section/item                 | Item No | Recommendation                                                                                                                                                                                                                                                                                                                                                                                                                                                         | Reported on Page Number/Line Number | Reported on Section/Paragraph |
|------------------------------|---------|------------------------------------------------------------------------------------------------------------------------------------------------------------------------------------------------------------------------------------------------------------------------------------------------------------------------------------------------------------------------------------------------------------------------------------------------------------------------|-------------------------------------|-------------------------------|
| Title and abstract           | 1       | (a) Indicate the study's design with a commonly used term in the title or the abstract                                                                                                                                                                                                                                                                                                                                                                                 | Page 1 / Line 1-2                   | Title/ Para 1                 |
|                              |         | (b) Provide in the abstract an informative and balanced summary of what was done and what was found                                                                                                                                                                                                                                                                                                                                                                    | Page 3 / Line 40-45                 | Abstract/ Para 2              |
| <b>Introduction</b>          |         |                                                                                                                                                                                                                                                                                                                                                                                                                                                                        |                                     |                               |
| Background/<br>rationale     | 2       | Explain the scientific background and rationale for the investigation being reported                                                                                                                                                                                                                                                                                                                                                                                   | Page 6 / Line 71-82                 | Introduction / Para 1         |
| Objectives                   | 3       | State specific objectives, including any prespecified hypotheses                                                                                                                                                                                                                                                                                                                                                                                                       | Page 6 / Line 80-82                 | Introduction / Para 1         |
| <b>Methods</b>               |         |                                                                                                                                                                                                                                                                                                                                                                                                                                                                        |                                     |                               |
| Study design                 | 4       | Present key elements of study design early in the paper                                                                                                                                                                                                                                                                                                                                                                                                                | Page 6-7 / Line 85-89               | Methods / Para 1              |
| Setting                      | 5       | Describe the setting, locations, and relevant dates, including periods of recruitment, exposure, follow-up, and data collection                                                                                                                                                                                                                                                                                                                                        | Page 6-7 / Line 86-89               | Methods / Para 1              |
| Participants                 | 6       | (a) <b>Cohort study</b> —Give the eligibility criteria, and the sources and methods of selection of participants. Describe methods of follow-up<br><b>Case-control study</b> —Give the eligibility criteria, and the sources and methods of case ascertainment and control selection. Give the rationale for the choice of cases and controls<br><b>Cross-sectional study</b> —Give the eligibility criteria, and the sources and methods of selection of participants | Page 6-7 / Line 86-99               | Methods / Para 1-2            |
|                              |         | (b) <b>Cohort study</b> —For matched studies, give matching criteria and number of exposed and unexposed<br><b>Case-control study</b> —For matched studies, give matching criteria and the number of controls per case                                                                                                                                                                                                                                                 | Page 7 / Line 100-103               | Methods / Para 3              |
| Variables                    | 7       | Clearly define all outcomes, exposures, predictors, potential confounders, and effect modifiers. Give diagnostic criteria, if applicable                                                                                                                                                                                                                                                                                                                               | Page 7 / Line 100-110               | Methods / Para 3              |
| Data sources/<br>measurement | 8       | For each variable of interest, give sources of data and details of methods of assessment (measurement). Describe comparability of assessment methods if there is more than one group                                                                                                                                                                                                                                                                                   | Page 7 / Line 90-110                | Methods / Para 3              |
| Bias                         | 9       | Describe any efforts to address potential sources of bias                                                                                                                                                                                                                                                                                                                                                                                                              | Page 7 / Line 90-99                 | Discussion / Para 2           |
| Study size                   | 10      | Explain how the study size was arrived at                                                                                                                                                                                                                                                                                                                                                                                                                              | Page 6-7 / Line 86-89               | Methods / Para 1              |
| Quantitative variables       | 11      | Explain how quantitative variables were handled in the analyses. If applicable, describe which groupings were chosen and why                                                                                                                                                                                                                                                                                                                                           | Page 7-8 / Line 103-110             | Methods / Para 3              |

|                     |    |                                                                                                                                                                                                                                                                                                           |                           |                     |
|---------------------|----|-----------------------------------------------------------------------------------------------------------------------------------------------------------------------------------------------------------------------------------------------------------------------------------------------------------|---------------------------|---------------------|
| Statistical methods | 12 | (a) Describe all statistical methods, including those used to control for confounding                                                                                                                                                                                                                     | Page 8 / Line 111-115     | Methods / Para 4    |
|                     |    | (b) Describe any methods used to examine subgroups and interactions                                                                                                                                                                                                                                       | Page 8 / Line 111-115     | Methods / Para 4    |
|                     |    | (c) Explain how missing data were addressed                                                                                                                                                                                                                                                               | Page 7 / Line 97-99       | Methods / Para 2    |
|                     |    | (d) <b>Cohort study</b> —If applicable, explain how loss to follow-up was addressed<br><b>Case-control study</b> —If applicable, explain how matching of cases and controls was addressed<br><b>Cross-sectional study</b> —If applicable, describe analytical methods taking account of sampling strategy | N/A                       | N/A                 |
|                     |    | (e) Describe any sensitivity analyses                                                                                                                                                                                                                                                                     | N/A                       | N/A                 |
| <b>Results</b>      |    |                                                                                                                                                                                                                                                                                                           |                           |                     |
| Participants        | 13 | (a) Report numbers of individuals at each stage of study—eg numbers potentially eligible, examined for eligibility, confirmed eligible, included in the study, completing follow-up, and analysed                                                                                                         | Page 8 / Line 118-122     | Results / Para 1    |
|                     |    | (b) Give reasons for non-participation at each stage                                                                                                                                                                                                                                                      | Page 8 / Line 118-122     | Results/ Para 1     |
|                     |    | (c) Consider use of a flow diagram                                                                                                                                                                                                                                                                        | N/A                       | N/A                 |
| Descriptive data    | 14 | (a) Give characteristics of study participants (eg demographic, clinical, social) and information on exposures and potential confounders                                                                                                                                                                  | Page 8 / Line 122-123     | Results / Para 1    |
|                     |    | (b) Indicate number of participants with missing data for each variable of interest                                                                                                                                                                                                                       | Page 8 / Line 118-128     | Results / Para 1    |
|                     |    | (c) <b>Cohort study</b> —Summarise follow-up time (eg, average and total amount)                                                                                                                                                                                                                          | N/A                       | N/A                 |
| Outcome data        | 15 | <b>Cohort study</b> —Report numbers of outcome events or summary measures over time                                                                                                                                                                                                                       | Page 8 / Line 118-123     | Results / Para 1    |
|                     |    | <b>Case-control study</b> —Report numbers in each exposure category, or summary measures of exposure                                                                                                                                                                                                      | N/A                       |                     |
|                     |    | <b>Cross-sectional study</b> —Report numbers of outcome events or summary measures                                                                                                                                                                                                                        | N/A                       |                     |
| Main results        | 16 | (a) Give unadjusted estimates and, if applicable, confounder-adjusted estimates and their precision (eg, 95% confidence interval). Make clear which confounders were adjusted for and why they were included                                                                                              | Page 9 / Line 129-136     | Results / Para 2    |
|                     |    | (b) Report category boundaries when continuous variables were categorized                                                                                                                                                                                                                                 | Page 9 / Line 129-136     | Results / Para 2    |
|                     |    | (c) If relevant, consider translating estimates of relative risk into absolute risk for a meaningful time period                                                                                                                                                                                          | N/A                       |                     |
| Other analyses      | 17 | Report other analyses done—eg analyses of subgroups and interactions, and sensitivity analyses                                                                                                                                                                                                            | Page 9 / Line 129-136     | Results / Para 2    |
| <b>Discussion</b>   |    |                                                                                                                                                                                                                                                                                                           |                           |                     |
| Key results         | 18 | Summarise key results with reference to study objectives                                                                                                                                                                                                                                                  | Page 9 / Line 123-149     | Discussion / Para 1 |
| Limitations         | 19 | Discuss limitations of the study, taking into account sources of potential bias or imprecision. Discuss both direction and magnitude of any potential bias                                                                                                                                                | Page 11-12 / Line 164-183 | Discussion / Para 4 |

|                          |    |                                                                                                                                                                            |                           |                     |
|--------------------------|----|----------------------------------------------------------------------------------------------------------------------------------------------------------------------------|---------------------------|---------------------|
| Interpretation           | 20 | Give a cautious overall interpretation of results considering objectives, limitations, multiplicity of analyses, results from similar studies, and other relevant evidence | Page 11-12 / Line 164-183 | Discussion / Para 4 |
| Generalisability         | 21 | Discuss the generalisability (external validity) of the study results                                                                                                      | Page 12 / Line 181-183    | Discussion / Para 4 |
| <b>Other information</b> |    |                                                                                                                                                                            |                           |                     |
| Funding                  | 22 | Give the source of funding and the role of the funders for the present study and, if applicable, for the original study on which the present article is based              | No funding                | Acknowledgments     |

\*Give information separately for cases and controls in case-control studies and, if applicable, for exposed and unexposed groups in cohort and cross-sectional studies.

**Note:** An Explanation and Elaboration article discusses each checklist item and gives methodological background and published examples of transparent reporting. The STROBE checklist is best used in conjunction with this article (freely available on the Web sites of PLoS Medicine at <http://www.plosmedicine.org/>, Annals of Internal Medicine at <http://www.annals.org/>, and Epidemiology at <http://www.epidem.com/>). Information on the STROBE Initiative is available at [www.strobe-statement.org](http://www.strobe-statement.org).

Article information: <https://dx.doi.org/10.21037/jtd-24-784>

\*As the checklist was provided upon initial submission, the page number/line number reported may be changed due to copyediting and may not be referable in the published version. In this case, the section/paragraph may be used as an alternative reference.
